# Supplementary material for: Dielectrophoretic and Electrical Impedance Differentiation of Cancerous Cells Based on Biophysical Phenotype
Source: MDPI journal article supplement (doi:10.3390/bios11100401), 2021-10-17
Supplement: s1 [file s1]

Supplementary Material

# Dielectrophoretic and Electrical Impedance Differentiation of Cancerous Cells Based on Biophysical Phenotype

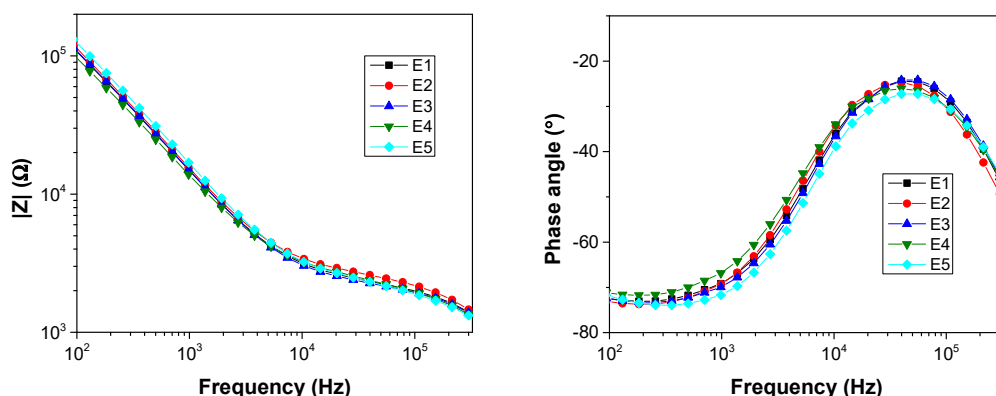

**Figure S1.** Microelectrodes reproducibility: Impedance magnitudes and phase angles of trapped T2 cancer cells at 9 Vpp, 1 MHz obtained for 5 independent interdigitated microelectrodes.

**Table S1.** Summary of reproducibility tests by EIS technique performed at the level of 5 independent interdigitated microelectrodes.

|                 | 10 <sup>3</sup> (Hz) |       |         | 10 <sup>4</sup> (Hz) |       |         | 10 <sup>5</sup> (Hz) |      |         |
|-----------------|----------------------|-------|---------|----------------------|-------|---------|----------------------|------|---------|
|                 | Mean value           | SD    | RSD (%) | Mean value           | SD    | RSD (%) | Mean value           | SD   | RSD (%) |
| Z  (Ω)          | 15278.6              | 983.7 | 6.44    | 3196.5               | 121.3 | 3.79    | 1954.9               | 96.8 | 4.95    |
| Phase angle (°) | -69.4                | 1.5   | 2.24    | -35.9                | 1.7   | 4.88    | -30.0                | 1.1  | 3.62    |

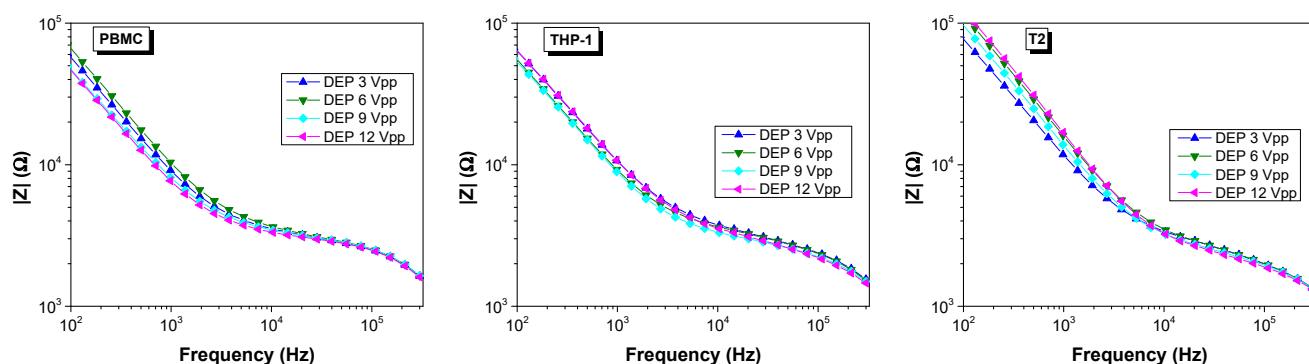

**Figure S2.** Impedance magnitudes of trapped PBMC, THP-1 and T2 cells at 3, 6, 9 and 12 Vpp.

**Table S2.** The reciprocal cell dielectric phenotype of cancer and normal blood cells.

| Cell type | 1/Rφ (10 <sup>6</sup> m <sup>-1</sup> ) |
|-----------|-----------------------------------------|
| PBMC      | 0.326 ± 0.016                           |
| THP-1     | 0.176 ± 0.007                           |
| Jurkat    | 0.097 ± 0.005                           |
| SW-403    | 0.087 ± 0.004                           |
| T1        | 0.089 ± 0.003                           |
| T1        | 0.096 ± 0.004                           |
